# Supplementary material for: Development of a highly sensitive ampicillin sensor utilizing functionalized aptamers
Source: Royal Society of Chemistry journal article supplement (doi:10.1039/d4ay00130c), 2024-01-01
Supplement: d4ay00130c1.pdf [file d4ay00130c1.pdf]

## Supporting Information

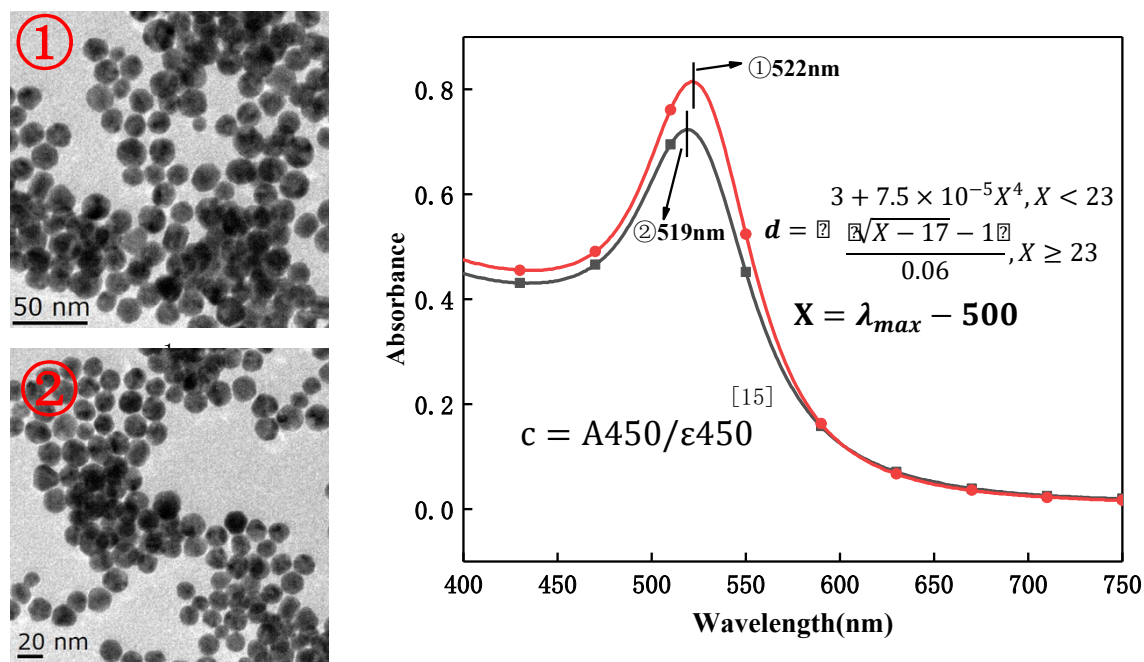

Fig.S1 The left is TEM of gold nanoparticles prepared by sodium citrate reduction method, and the right is UV-VIS absorption spectra. (1 is the product when the concentration of sodium citrate is 0.002M; 2 is the product of sodium citrate at a concentration of  $7.2 \times 10^{-4}$ M)

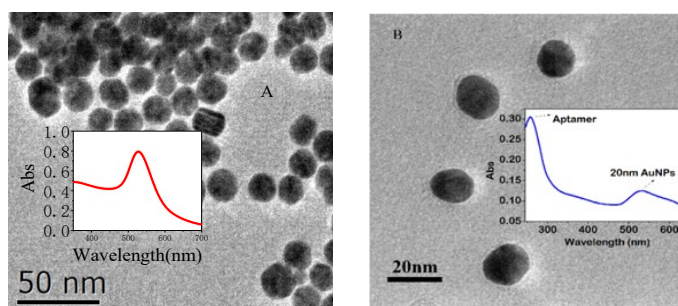

Fig.S2 UV-visible absorption spectra and TEM images of AuNPs and AuNPs+polyA6-aptamer.

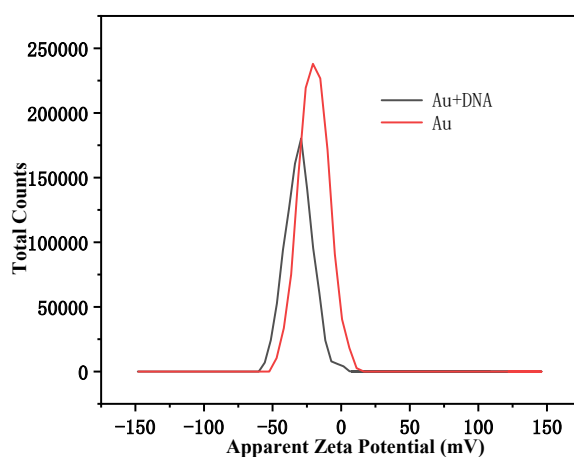

Fig.S3 Zeta potential measurement results of AuNPs and AuNPs+polyA6-aptamer.

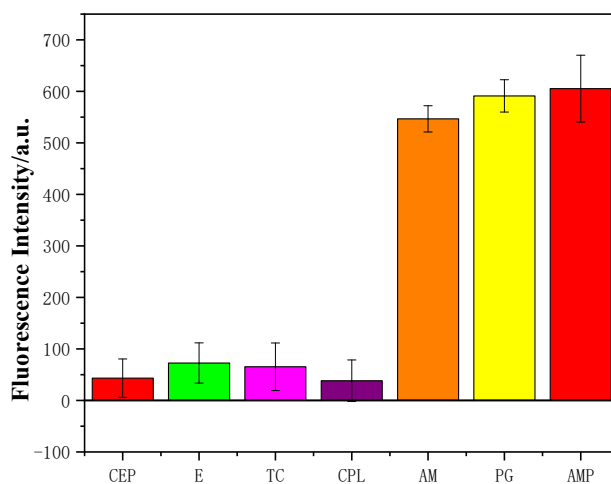

Fig.S4 The change in fluorescence intensity of the working solution after the addition of different types of antibiotics.

Table S1 Comparison of AMP detection methods

| Method of detection | Limit of detection | Sensitivity            | Real sample detection           | References |
|---------------------|--------------------|------------------------|---------------------------------|------------|
| HPLC                | 6.933 $\mu$ M      | 9485.965 AU / $\mu$ M  | Capsule                         | [24]       |
|                     | 7.11 $\mu$ M       | 0.17 $\mu$ A / $\mu$ M | Capsule                         | [25]       |
|                     | 1 pM               | 1.0248 $\mu$ A /pM     | Milk                            | [26]       |
| Colorimetry         | 34.3nM             | 0.0204 a.u. / $\mu$ M  | Lake water                      | [27]       |
|                     | 21.7 pM            | 0.0523 a.u. /nM        | Human serum                     | [28]       |
|                     | 6.2 $\mu$ M        | 0.00382 a.u. / $\mu$ M | Tap water, River water and Milk | [29]       |

|              |         |                      |                           |           |
|--------------|---------|----------------------|---------------------------|-----------|
| Fluorescence | 0.915nM | 358.15 a.u./ $\mu$ M | Milk, Pork, Tap Water     | [10]      |
|              | 0.01nM  | 106.79 r.f.u /nM     | Milk, Honey and Egg White | [11]      |
|              | 1.83nM  | 0.106 a.u. /nM       | Milk, lake water          | [30]      |
|              | 29.2 pM | 0.1721 a.u./nM       | Human serum               | [16]      |
|              | 18nM    | 16.87 a.u. / $\mu$ M | Milk                      | [17]      |
|              | 0.094nM | 597.96 a.u. /nM      | Milk and Tap water        | This work |
